# Supplementary material
Source: publisher figshare collection journal article supplement (https://acs.figshare.com/ndownloader/files/9361174)
Supplement: Supplementary file 1 [file 9361174]

  
data_PUSLCS09 
  
_audit_creation_method            SHELXL-97 
_chemical_name_systematic 
; 
 ? 
; 
_chemical_name_common             ? 
_chemical_melting_point           ? 
_chemical_formula_moiety          
 'C19 H30 O3 Si' 
_chemical_formula_sum 
 'C19 H30 O3 Si' 
_chemical_formula_weight          334.52 
  
loop_ 
 _atom_type_symbol 
 _atom_type_description 
 _atom_type_scat_dispersion_real 
 _atom_type_scat_dispersion_imag 
 _atom_type_scat_source 
 'C'  'C'   0.0033   0.0016 
 'International Tables Vol C Tables 4.2.6.8 and 6.1.1.4' 
 'H'  'H'   0.0000   0.0000 
 'International Tables Vol C Tables 4.2.6.8 and 6.1.1.4' 
 'O'  'O'   0.0106   0.0060 
 'International Tables Vol C Tables 4.2.6.8 and 6.1.1.4' 
 'Si'  'Si'   0.0817   0.0704 
 'International Tables Vol C Tables 4.2.6.8 and 6.1.1.4' 
  
_symmetry_cell_setting            Monoclinic 
_symmetry_space_group_name_H-M    'P 21/n'
_symmetry_space_group_name_Hall   '-P 2yn' 
  
loop_ 
 _symmetry_equiv_pos_as_xyz 
 'x, y, z' 
 '-x+1/2, y+1/2, -z+1/2' 
 '-x, -y, -z' 
 'x-1/2, -y-1/2, z-1/2' 
  
_cell_length_a                    7.2951(3) 
_cell_length_b                    25.7751(10) 
_cell_length_c                    10.6210(5) 
_cell_angle_alpha                 90.00 
_cell_angle_beta                  95.7546(29) 
_cell_angle_gamma                 90.00 
_cell_volume                      1987.02(15) 
_cell_formula_units_Z             4 
_cell_measurement_temperature     296(2) 
_cell_measurement_reflns_used     4987 
_cell_measurement_theta_min       2.49 
_cell_measurement_theta_max       20.46 
  
_exptl_crystal_description        Prism 
_exptl_crystal_colour             colourless 
_exptl_crystal_size_max           0.40 
_exptl_crystal_size_mid           0.40 
_exptl_crystal_size_min           0.18 
_exptl_crystal_density_meas       . 
_exptl_crystal_density_diffrn     1.118 
_exptl_crystal_density_method     'not measured' 
_exptl_crystal_F_000              728 
_exptl_absorpt_coefficient_mu     0.130 
_exptl_absorpt_correction_type    multi-scan 
_exptl_absorpt_correction_T_min   0.9499 
_exptl_absorpt_correction_T_max   0.9770 
_exptl_absorpt_process_details    'SAINT ver. 8.34A; BRUKER SADABS' 
  
_exptl_special_details 
; 
 ? 
; 
  
_diffrn_ambient_temperature       296(2) 
_diffrn_radiation_wavelength      0.71073 
_diffrn_radiation_type            MoK\a 
_diffrn_radiation_source          'fine-focus sealed tube' 
_diffrn_radiation_monochromator   graphite 
_diffrn_measurement_device_type   'CCD area detector' 
_diffrn_measurement_method        'phi and omega scans' 
_diffrn_reflns_number             26348 
_diffrn_reflns_av_R_equivalents   0.0599 
_diffrn_reflns_av_sigmaI/netI     0.0330 
_diffrn_reflns_limit_h_min        -8 
_diffrn_reflns_limit_h_max        8 
_diffrn_reflns_limit_k_min        -30 
_diffrn_reflns_limit_k_max        30 
_diffrn_reflns_limit_l_min        -12 
_diffrn_reflns_limit_l_max        11 
_diffrn_reflns_theta_min          2.92 
_diffrn_reflns_theta_max          24.71 
_reflns_number_total              3396 
_reflns_number_gt                 2129 
_reflns_threshold_expression      >2sigma(I) 
  
_computing_data_collection        'Bruker APEX2' 
_computing_cell_refinement        'Bruker APEX2' 
_computing_data_reduction         'Bruker SAINT' 
_computing_structure_solution     'SHELXS-97 (Sheldrick, 1990)' 
_computing_structure_refinement   'SHELXL-97 (Sheldrick, 1997)' 
_computing_molecular_graphics     'Bruker SHELXTL' 
_computing_publication_material   'Bruker SHELXTL' 
  
_refine_special_details 
; 
 Refinement of F^2^ against ALL reflections.  The weighted R-factor wR and 
 goodness of fit S are based on F^2^, conventional R-factors R are based 
 on F, with F set to zero for negative F^2^. The threshold expression of 
 F^2^ > 2sigma(F^2^) is used only for calculating R-factors(gt) etc. and is 
 not relevant to the choice of reflections for refinement.  R-factors based 
 on F^2^ are statistically about twice as large as those based on F, and R- 
 factors based on ALL data will be even larger. 
; 
  
_refine_ls_structure_factor_coef  Fsqd 
_refine_ls_matrix_type            full 
_refine_ls_weighting_scheme       calc 
_refine_ls_weighting_details 
 'calc w=1/[\s^2^(Fo^2^)+(0.0513P)^2^+2.4756P] where P=(Fo^2^+2Fc^2^)/3' 
_atom_sites_solution_primary      direct 
_atom_sites_solution_secondary    difmap 
_atom_sites_solution_hydrogens    geom 
_refine_ls_hydrogen_treatment     constr 
_refine_ls_extinction_method      none 
_refine_ls_extinction_coef        ? 
_refine_ls_number_reflns          3396 
_refine_ls_number_parameters      213 
_refine_ls_number_restraints      0 
_refine_ls_R_factor_all           0.1252 
_refine_ls_R_factor_gt            0.0836 
_refine_ls_wR_factor_ref          0.1987 
_refine_ls_wR_factor_gt           0.1757 
_refine_ls_goodness_of_fit_ref    1.032 
_refine_ls_restrained_S_all       1.032 
_refine_ls_shift/su_max           0.000 
_refine_ls_shift/su_mean          0.000 
  
loop_ 
 _atom_site_label 
 _atom_site_type_symbol 
 _atom_site_fract_x 
 _atom_site_fract_y 
 _atom_site_fract_z 
 _atom_site_U_iso_or_equiv 
 _atom_site_adp_type 
 _atom_site_occupancy 
 _atom_site_symmetry_multiplicity 
 _atom_site_calc_flag 
 _atom_site_refinement_flags 
 _atom_site_disorder_assembly 
 _atom_site_disorder_group 
Si1 Si -0.04798(18) 0.31663(5) 0.02013(12) 0.0815(4) Uani 1 1 d . . . 
O1 O 0.2887(6) 0.53851(15) 0.4749(5) 0.1438(18) Uani 1 1 d . . . 
O2 O -0.1104(7) 0.43416(14) 0.0556(5) 0.185(3) Uani 1 1 d . . . 
O3 O 0.0299(4) 0.34238(10) 0.1556(3) 0.0817(9) Uani 1 1 d . . . 
C1 C 0.3056(8) 0.5264(2) 0.3652(7) 0.1072(19) Uani 1 1 d . . . 
C2 C 0.4104(13) 0.5592(2) 0.2831(8) 0.169(4) Uani 1 1 d . . . 
H2A H 0.4677 0.5876 0.3325 0.203 Uiso 1 1 calc R . . 
H2B H 0.3266 0.5739 0.2158 0.203 Uiso 1 1 calc R . . 
C3 C 0.5543(14) 0.5286(3) 0.2274(7) 0.191(5) Uani 1 1 d . . . 
H3A H 0.6496 0.5192 0.2938 0.230 Uiso 1 1 calc R . . 
H3B H 0.6104 0.5500 0.1666 0.230 Uiso 1 1 calc R . . 
C4 C 0.4782(11) 0.4795(3) 0.1618(5) 0.166(3) Uani 1 1 d . . . 
H4A H 0.3918 0.4887 0.0899 0.199 Uiso 1 1 calc R . . 
H4B H 0.5781 0.4600 0.1309 0.199 Uiso 1 1 calc R . . 
C5 C 0.3820(6) 0.44641(15) 0.2531(4) 0.0689(11) Uani 1 1 d . . . 
H5A H 0.4739 0.4366 0.3226 0.083 Uiso 1 1 calc R . . 
C6 C 0.2299(6) 0.47588(16) 0.3098(5) 0.0846(14) Uani 1 1 d . . . 
C7 C 0.0705(9) 0.48637(19) 0.2072(8) 0.182(4) Uani 1 1 d . . . 
H7A H -0.0300 0.5031 0.2447 0.219 Uiso 1 1 calc R . . 
H7B H 0.1117 0.5096 0.1438 0.219 Uiso 1 1 calc R . . 
C8 C 0.0040(8) 0.43621(19) 0.1455(7) 0.133(2) Uani 1 1 d . . . 
C9 C 0.3019(6) 0.39595(15) 0.1915(4) 0.0702(11) Uani 1 1 d . . . 
H9A H 0.3197 0.3962 0.1022 0.084 Uiso 1 1 calc R . . 
H9B H 0.3688 0.3665 0.2300 0.084 Uiso 1 1 calc R . . 
C10 C 0.0971(6) 0.38939(14) 0.2059(4) 0.0699(11) Uani 1 1 d . . . 
C11 C 0.1571(7) 0.4409(2) 0.4077(5) 0.1117(19) Uani 1 1 d . . . 
H11A H 0.2572 0.4306 0.4696 0.134 Uiso 1 1 calc R . . 
H11B H 0.0666 0.4595 0.4513 0.134 Uiso 1 1 calc R . . 
C12 C 0.0698(6) 0.39344(19) 0.3442(5) 0.0910(15) Uani 1 1 d . . . 
C13 C -0.0257(10) 0.3596(3) 0.4007(6) 0.173(4) Uani 1 1 d . . . 
H13A H -0.0798 0.3317 0.3556 0.207 Uiso 1 1 calc R . . 
H13B H -0.0399 0.3633 0.4863 0.207 Uiso 1 1 calc R . . 
C14 C -0.3023(7) 0.3233(2) -0.0068(6) 0.132(2) Uani 1 1 d . . . 
H14A H -0.3485 0.3017 -0.0764 0.199 Uiso 1 1 calc R . . 
H14B H -0.3334 0.3589 -0.0260 0.199 Uiso 1 1 calc R . . 
H14C H -0.3563 0.3130 0.0680 0.199 Uiso 1 1 calc R . . 
C15 C 0.0648(9) 0.3437(2) -0.1151(5) 0.136(2) Uani 1 1 d . . . 
H15A H 0.0235 0.3250 -0.1909 0.204 Uiso 1 1 calc R . . 
H15B H 0.1961 0.3403 -0.0984 0.204 Uiso 1 1 calc R . . 
H15C H 0.0330 0.3797 -0.1258 0.204 Uiso 1 1 calc R . . 
C16 C 0.0171(7) 0.24682(17) 0.0442(4) 0.0859(13) Uani 1 1 d . . . 
C17 C -0.0840(10) 0.2245(2) 0.1518(6) 0.133(2) Uani 1 1 d . . . 
H17A H -0.2144 0.2252 0.1279 0.200 Uiso 1 1 calc R . . 
H17B H -0.0558 0.2449 0.2268 0.200 Uiso 1 1 calc R . . 
H17C H -0.0452 0.1893 0.1681 0.200 Uiso 1 1 calc R . . 
C18 C -0.0351(9) 0.2149(2) -0.0759(5) 0.133(2) Uani 1 1 d . . . 
H18A H -0.1659 0.2167 -0.0976 0.200 Uiso 1 1 calc R . . 
H18B H 0.0010 0.1795 -0.0611 0.200 Uiso 1 1 calc R . . 
H18C H 0.0268 0.2287 -0.1442 0.200 Uiso 1 1 calc R . . 
C19 C 0.2243(8) 0.2417(2) 0.0791(6) 0.130(2) Uani 1 1 d . . . 
H19A H 0.2596 0.2612 0.1546 0.195 Uiso 1 1 calc R . . 
H19B H 0.2886 0.2547 0.0111 0.195 Uiso 1 1 calc R . . 
H19C H 0.2551 0.2058 0.0935 0.195 Uiso 1 1 calc R . . 
  
loop_ 
 _atom_site_aniso_label 
 _atom_site_aniso_U_11 
 _atom_site_aniso_U_22 
 _atom_site_aniso_U_33 
 _atom_site_aniso_U_23 
 _atom_site_aniso_U_13 
 _atom_site_aniso_U_12 
Si1 0.0859(9) 0.0752(8) 0.0784(8) -0.0034(6) -0.0153(6) -0.0044(7) 
O1 0.114(3) 0.107(3) 0.211(5) -0.083(3) 0.015(3) -0.007(2) 
O2 0.181(4) 0.082(2) 0.257(6) 0.008(3) -0.152(4) 0.006(3) 
O3 0.101(2) 0.0600(17) 0.0803(19) -0.0110(14) -0.0105(16) -0.0022(15) 
C1 0.095(4) 0.070(3) 0.147(5) -0.028(4) -0.029(4) 0.011(3) 
C2 0.256(10) 0.084(5) 0.146(7) 0.030(4) -0.086(6) -0.066(6) 
C3 0.289(12) 0.170(8) 0.123(6) -0.019(5) 0.061(7) -0.149(8) 
C4 0.256(9) 0.157(6) 0.094(4) -0.019(4) 0.064(5) -0.120(6) 
C5 0.078(3) 0.074(3) 0.055(2) 0.0023(19) 0.0051(19) -0.006(2) 
C6 0.075(3) 0.054(2) 0.119(4) -0.016(2) -0.020(3) 0.011(2) 
C7 0.162(6) 0.059(3) 0.292(9) -0.021(4) -0.145(6) 0.020(3) 
C8 0.113(4) 0.066(3) 0.199(6) -0.005(4) -0.084(4) 0.010(3) 
C9 0.087(3) 0.073(3) 0.052(2) -0.0002(19) 0.011(2) 0.003(2) 
C10 0.072(3) 0.051(2) 0.083(3) -0.007(2) -0.009(2) 0.0068(19) 
C11 0.102(4) 0.101(4) 0.141(5) -0.060(4) 0.058(3) -0.026(3) 
C12 0.078(3) 0.088(3) 0.114(4) -0.041(3) 0.039(3) -0.013(2) 
C13 0.213(7) 0.167(6) 0.158(6) -0.085(5) 0.123(6) -0.106(6) 
C14 0.099(4) 0.111(4) 0.175(6) -0.011(4) -0.044(4) 0.000(3) 
C15 0.186(6) 0.137(5) 0.081(4) 0.015(3) -0.010(4) -0.046(5) 
C16 0.102(4) 0.075(3) 0.076(3) -0.022(2) -0.010(3) 0.001(3) 
C17 0.193(7) 0.083(4) 0.127(5) 0.009(3) 0.027(5) -0.001(4) 
C18 0.175(6) 0.109(4) 0.107(4) -0.043(3) -0.027(4) -0.001(4) 
C19 0.125(5) 0.117(4) 0.140(5) -0.040(4) -0.030(4) 0.039(4) 
  
_geom_special_details 
; 
 All esds (except the esd in the dihedral angle between two l.s. planes) 
 are estimated using the full covariance matrix.  The cell esds are taken 
 into account individually in the estimation of esds in distances, angles 
 and torsion angles; correlations between esds in cell parameters are only 
 used when they are defined by crystal symmetry.  An approximate (isotropic) 
 treatment of cell esds is used for estimating esds involving l.s. planes. 
; 
  
loop_ 
 _geom_bond_atom_site_label_1 
 _geom_bond_atom_site_label_2 
 _geom_bond_distance 
 _geom_bond_site_symmetry_2 
 _geom_bond_publ_flag 
Si1 O3 1.634(3) . ? 
Si1 C14 1.857(5) . ? 
Si1 C15 1.861(6) . ? 
Si1 C16 1.872(5) . ? 
O1 C1 1.224(7) . ? 
O2 C8 1.205(6) . ? 
O3 C10 1.394(4) . ? 
C1 C2 1.481(9) . ? 
C1 C6 1.511(6) . ? 
C2 C3 1.483(11) . ? 
C2 H2A 0.9700 . ? 
C2 H2B 0.9700 . ? 
C3 C4 1.522(8) . ? 
C3 H3A 0.9700 . ? 
C3 H3B 0.9700 . ? 
C4 C5 1.515(6) . ? 
C4 H4A 0.9700 . ? 
C4 H4B 0.9700 . ? 
C5 C6 1.518(6) . ? 
C5 C9 1.544(5) . ? 
C5 H5A 0.9800 . ? 
C6 C11 1.512(7) . ? 
C6 C7 1.536(6) . ? 
C7 C8 1.507(7) . ? 
C7 H7A 0.9700 . ? 
C7 H7B 0.9700 . ? 
C8 C10 1.497(6) . ? 
C9 C10 1.526(6) . ? 
C9 H9A 0.9700 . ? 
C9 H9B 0.9700 . ? 
C10 C12 1.506(6) . ? 
C11 C12 1.506(6) . ? 
C11 H11A 0.9700 . ? 
C11 H11B 0.9700 . ? 
C12 C13 1.300(7) . ? 
C13 H13A 0.9300 . ? 
C13 H13B 0.9300 . ? 
C14 H14A 0.9600 . ? 
C14 H14B 0.9600 . ? 
C14 H14C 0.9600 . ? 
C15 H15A 0.9600 . ? 
C15 H15B 0.9600 . ? 
C15 H15C 0.9600 . ? 
C16 C19 1.526(7) . ? 
C16 C18 1.533(6) . ? 
C16 C17 1.534(7) . ? 
C17 H17A 0.9600 . ? 
C17 H17B 0.9600 . ? 
C17 H17C 0.9600 . ? 
C18 H18A 0.9600 . ? 
C18 H18B 0.9600 . ? 
C18 H18C 0.9600 . ? 
C19 H19A 0.9600 . ? 
C19 H19B 0.9600 . ? 
C19 H19C 0.9600 . ? 
  
loop_ 
 _geom_angle_atom_site_label_1 
 _geom_angle_atom_site_label_2 
 _geom_angle_atom_site_label_3 
 _geom_angle 
 _geom_angle_site_symmetry_1 
 _geom_angle_site_symmetry_3 
 _geom_angle_publ_flag 
O3 Si1 C14 110.6(2) . . ? 
O3 Si1 C15 112.7(2) . . ? 
C14 Si1 C15 111.0(3) . . ? 
O3 Si1 C16 102.08(17) . . ? 
C14 Si1 C16 110.3(2) . . ? 
C15 Si1 C16 109.9(3) . . ? 
C10 O3 Si1 140.2(3) . . ? 
O1 C1 C2 121.5(6) . . ? 
O1 C1 C6 121.5(6) . . ? 
C2 C1 C6 116.9(6) . . ? 
C1 C2 C3 111.1(6) . . ? 
C1 C2 H2A 109.4 . . ? 
C3 C2 H2A 109.4 . . ? 
C1 C2 H2B 109.4 . . ? 
C3 C2 H2B 109.4 . . ? 
H2A C2 H2B 108.0 . . ? 
C2 C3 C4 112.6(7) . . ? 
C2 C3 H3A 109.1 . . ? 
C4 C3 H3A 109.1 . . ? 
C2 C3 H3B 109.1 . . ? 
C4 C3 H3B 109.1 . . ? 
H3A C3 H3B 107.8 . . ? 
C5 C4 C3 110.3(5) . . ? 
C5 C4 H4A 109.6 . . ? 
C3 C4 H4A 109.6 . . ? 
C5 C4 H4B 109.6 . . ? 
C3 C4 H4B 109.6 . . ? 
H4A C4 H4B 108.1 . . ? 
C4 C5 C6 112.1(5) . . ? 
C4 C5 C9 112.6(4) . . ? 
C6 C5 C9 109.2(3) . . ? 
C4 C5 H5A 107.6 . . ? 
C6 C5 H5A 107.6 . . ? 
C9 C5 H5A 107.6 . . ? 
C1 C6 C11 112.7(5) . . ? 
C1 C6 C5 109.4(4) . . ? 
C11 C6 C5 107.2(3) . . ? 
C1 C6 C7 110.2(4) . . ? 
C11 C6 C7 107.4(5) . . ? 
C5 C6 C7 109.8(5) . . ? 
C8 C7 C6 110.2(4) . . ? 
C8 C7 H7A 109.6 . . ? 
C6 C7 H7A 109.6 . . ? 
C8 C7 H7B 109.6 . . ? 
C6 C7 H7B 109.6 . . ? 
H7A C7 H7B 108.1 . . ? 
O2 C8 C10 123.5(4) . . ? 
O2 C8 C7 123.3(4) . . ? 
C10 C8 C7 113.1(4) . . ? 
C10 C9 C5 112.6(3) . . ? 
C10 C9 H9A 109.1 . . ? 
C5 C9 H9A 109.1 . . ? 
C10 C9 H9B 109.1 . . ? 
C5 C9 H9B 109.1 . . ? 
H9A C9 H9B 107.8 . . ? 
O3 C10 C8 114.2(3) . . ? 
O3 C10 C12 111.0(4) . . ? 
C8 C10 C12 105.2(4) . . ? 
O3 C10 C9 111.6(3) . . ? 
C8 C10 C9 106.0(4) . . ? 
C12 C10 C9 108.5(3) . . ? 
C12 C11 C6 109.8(4) . . ? 
C12 C11 H11A 109.7 . . ? 
C6 C11 H11A 109.7 . . ? 
C12 C11 H11B 109.7 . . ? 
C6 C11 H11B 109.7 . . ? 
H11A C11 H11B 108.2 . . ? 
C13 C12 C10 122.2(4) . . ? 
C13 C12 C11 124.1(5) . . ? 
C10 C12 C11 113.7(4) . . ? 
C12 C13 H13A 120.0 . . ? 
C12 C13 H13B 120.0 . . ? 
H13A C13 H13B 120.0 . . ? 
Si1 C14 H14A 109.5 . . ? 
Si1 C14 H14B 109.5 . . ? 
H14A C14 H14B 109.5 . . ? 
Si1 C14 H14C 109.5 . . ? 
H14A C14 H14C 109.5 . . ? 
H14B C14 H14C 109.5 . . ? 
Si1 C15 H15A 109.5 . . ? 
Si1 C15 H15B 109.5 . . ? 
H15A C15 H15B 109.5 . . ? 
Si1 C15 H15C 109.5 . . ? 
H15A C15 H15C 109.5 . . ? 
H15B C15 H15C 109.5 . . ? 
C19 C16 C18 108.2(4) . . ? 
C19 C16 C17 109.0(5) . . ? 
C18 C16 C17 108.7(4) . . ? 
C19 C16 Si1 110.4(4) . . ? 
C18 C16 Si1 111.3(3) . . ? 
C17 C16 Si1 109.2(3) . . ? 
C16 C17 H17A 109.5 . . ? 
C16 C17 H17B 109.5 . . ? 
H17A C17 H17B 109.5 . . ? 
C16 C17 H17C 109.5 . . ? 
H17A C17 H17C 109.5 . . ? 
H17B C17 H17C 109.5 . . ? 
C16 C18 H18A 109.5 . . ? 
C16 C18 H18B 109.5 . . ? 
H18A C18 H18B 109.5 . . ? 
C16 C18 H18C 109.5 . . ? 
H18A C18 H18C 109.5 . . ? 
H18B C18 H18C 109.5 . . ? 
C16 C19 H19A 109.5 . . ? 
C16 C19 H19B 109.5 . . ? 
H19A C19 H19B 109.5 . . ? 
C16 C19 H19C 109.5 . . ? 
H19A C19 H19C 109.5 . . ? 
H19B C19 H19C 109.5 . . ? 
  
loop_ 
 _geom_torsion_atom_site_label_1 
 _geom_torsion_atom_site_label_2 
 _geom_torsion_atom_site_label_3 
 _geom_torsion_atom_site_label_4 
 _geom_torsion 
 _geom_torsion_site_symmetry_1 
 _geom_torsion_site_symmetry_2 
 _geom_torsion_site_symmetry_3 
 _geom_torsion_site_symmetry_4 
 _geom_torsion_publ_flag 
C14 Si1 O3 C10 -91.5(5) . . . . ? 
C15 Si1 O3 C10 33.4(5) . . . . ? 
C16 Si1 O3 C10 151.2(4) . . . . ? 
O1 C1 C2 C3 126.2(7) . . . . ? 
C6 C1 C2 C3 -50.3(8) . . . . ? 
C1 C2 C3 C4 52.1(9) . . . . ? 
C2 C3 C4 C5 -56.2(10) . . . . ? 
C3 C4 C5 C6 56.5(8) . . . . ? 
C3 C4 C5 C9 180.0(6) . . . . ? 
O1 C1 C6 C11 -7.3(7) . . . . ? 
C2 C1 C6 C11 169.2(5) . . . . ? 
O1 C1 C6 C5 -126.5(6) . . . . ? 
C2 C1 C6 C5 50.1(6) . . . . ? 
O1 C1 C6 C7 112.7(7) . . . . ? 
C2 C1 C6 C7 -70.7(7) . . . . ? 
C4 C5 C6 C1 -52.2(6) . . . . ? 
C9 C5 C6 C1 -177.6(4) . . . . ? 
C4 C5 C6 C11 -174.7(4) . . . . ? 
C9 C5 C6 C11 59.9(4) . . . . ? 
C4 C5 C6 C7 68.9(5) . . . . ? 
C9 C5 C6 C7 -56.5(5) . . . . ? 
C1 C6 C7 C8 176.0(6) . . . . ? 
C11 C6 C7 C8 -60.8(7) . . . . ? 
C5 C6 C7 C8 55.4(8) . . . . ? 
C6 C7 C8 O2 -174.1(8) . . . . ? 
C6 C7 C8 C10 4.8(9) . . . . ? 
C4 C5 C9 C10 -125.9(5) . . . . ? 
C6 C5 C9 C10 -0.8(5) . . . . ? 
Si1 O3 C10 C8 36.8(7) . . . . ? 
Si1 O3 C10 C12 155.5(4) . . . . ? 
Si1 O3 C10 C9 -83.3(5) . . . . ? 
O2 C8 C10 O3 -4.9(10) . . . . ? 
C7 C8 C10 O3 176.2(6) . . . . ? 
O2 C8 C10 C12 -126.8(8) . . . . ? 
C7 C8 C10 C12 54.3(7) . . . . ? 
O2 C8 C10 C9 118.4(7) . . . . ? 
C7 C8 C10 C9 -60.5(7) . . . . ? 
C5 C9 C10 O3 -176.8(3) . . . . ? 
C5 C9 C10 C8 58.3(5) . . . . ? 
C5 C9 C10 C12 -54.3(4) . . . . ? 
C1 C6 C11 C12 175.3(4) . . . . ? 
C5 C6 C11 C12 -64.2(5) . . . . ? 
C7 C6 C11 C12 53.7(5) . . . . ? 
O3 C10 C12 C13 -8.0(7) . . . . ? 
C8 C10 C12 C13 115.9(7) . . . . ? 
C9 C10 C12 C13 -131.0(6) . . . . ? 
O3 C10 C12 C11 174.0(4) . . . . ? 
C8 C10 C12 C11 -62.0(5) . . . . ? 
C9 C10 C12 C11 51.0(5) . . . . ? 
C6 C11 C12 C13 -170.7(6) . . . . ? 
C6 C11 C12 C10 7.2(6) . . . . ? 
O3 Si1 C16 C19 -56.9(4) . . . . ? 
C14 Si1 C16 C19 -174.5(4) . . . . ? 
C15 Si1 C16 C19 62.9(4) . . . . ? 
O3 Si1 C16 C18 -177.2(4) . . . . ? 
C14 Si1 C16 C18 65.3(5) . . . . ? 
C15 Si1 C16 C18 -57.4(5) . . . . ? 
O3 Si1 C16 C17 62.8(4) . . . . ? 
C14 Si1 C16 C17 -54.7(4) . . . . ? 
C15 Si1 C16 C17 -177.4(4) . . . . ? 
  
loop_ 
 _geom_hbond_atom_site_label_D 
 _geom_hbond_atom_site_label_H 
 _geom_hbond_atom_site_label_A 
 _geom_hbond_distance_DH 
 _geom_hbond_distance_HA 
 _geom_hbond_distance_DA 
 _geom_hbond_angle_DHA 
 _geom_hbond_site_symmetry_A 
C7 H7B O2  0.97 2.57 3.497(10) 160.9 3_565 
  
_diffrn_measured_fraction_theta_max    0.999 
_diffrn_reflns_theta_full              24.71 
_diffrn_measured_fraction_theta_full   0.999 
_refine_diff_density_max    0.277 
_refine_diff_density_min   -0.214 
_refine_diff_density_rms    0.040 

# start Validation Reply Form
_vrf_PLAT241_PUSLCS09
;
PROBLEM: High   'MainMol' Ueq as Compared to Neighbors of         C7 Check 
RESPONSE: The quality of this set of data is less than ideal, resulting in
a higher than usual displacement parameters for most of the atoms within
the structure. The structure is, however, well defined.
;
# end Validation Reply Form
